# Supplementary material for: Chilli veinal mottle virus HCPro interacts with catalase to facilitate virus infection in Nicotiana tabacum
Source: PubMed Central journal article supplement (PMC7501817; doi:10.1093/jxb/eraa304), 2020-06-28
Supplement: eraa304_suppl_supplementary_figures.pdf [file eraa304_suppl_supplementary_figures.pdf]

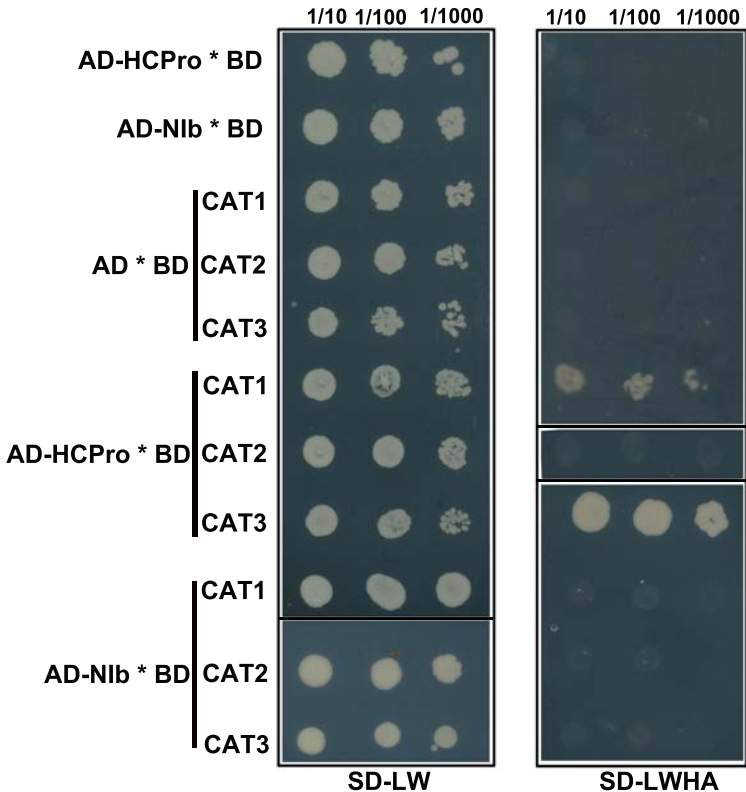

Figure S1. CATs specifically interacted with HCPro.

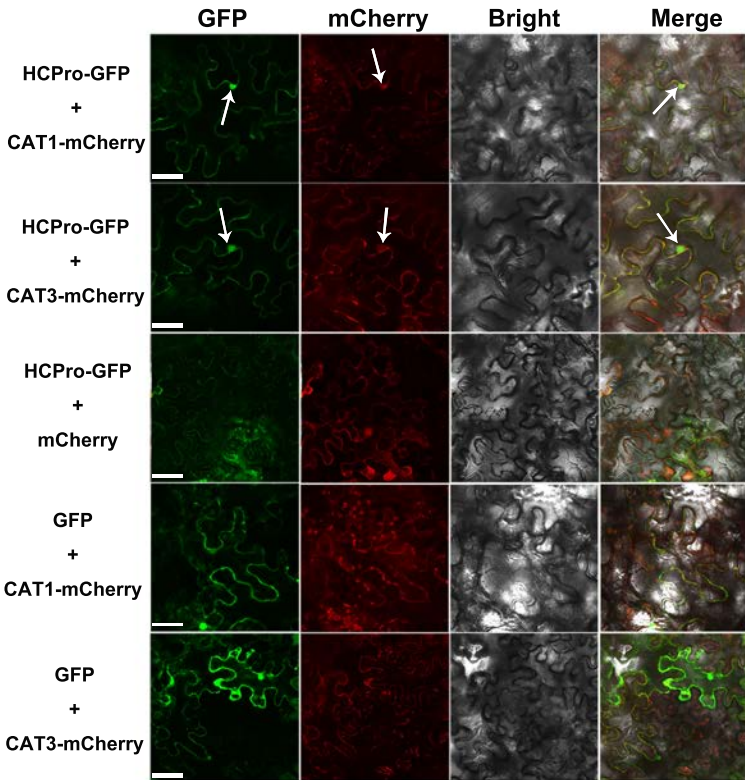

**Figure S2. CAT1 and CAT3 colocalized to ChiVMV HCPPro in *N. benthamiana* leaves. Scale bars = 50  $\mu$ m.**

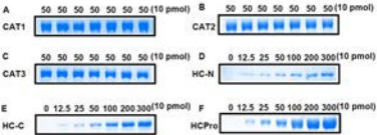

**Figure S3. Coomassie brilliant blue staining of CAT1, CAT2, CAT3 and deletion mutants of HCPPro at the varying amounts used in this assay. HC-N (1–100 aa), HC-C (301–457 aa). The full length of HCPPro is marked as HCPPro.**

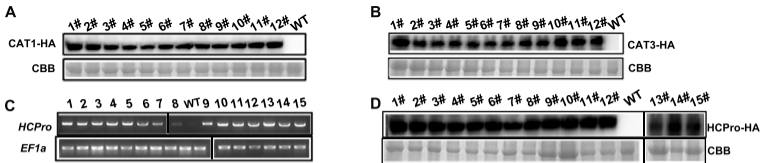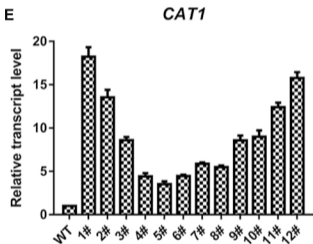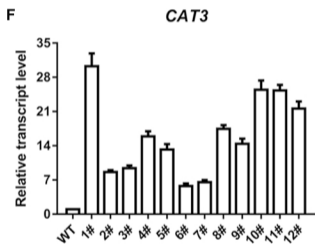

**Figure S4. Identification of overexpression transgenic plants.**

Western blot analysis of (A) CAT1 expression and (B) CAT3 expression by HA antibody. (C) Analysis of HCPPro expression by reverse transcription PCR and (D) Western blot. *EF1a* was used as loading control. qPCR analysis of (E) *CAT1* and (F) *CAT3* expression levels in T0 lines. Expression levels were standardized to *EF1a*, and result of WT was set at 1. Bars represent mean and standard deviation of values obtained from three biological repeats.

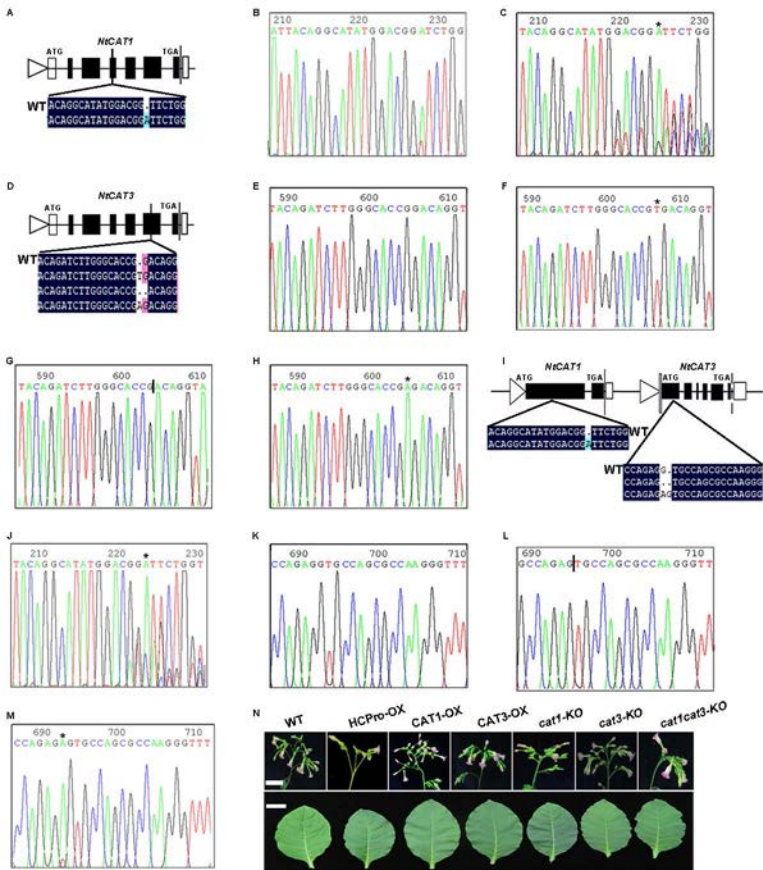

**Figure S5. Phenotype and identification of *cat1*-KO, *cat3*-KO, *cat1cat3*-KO transgenic lines.**

(A) Sequencing analysis of targeted region mutations of *CAT1* in representative T0 lines. Sanger

sequencing chromatogram of cloned *CAT1* in (B) WT and (C) *cat1*-KO plants. (D) Sequencing

analysis of targeted region mutations of *CAT3* in representative transgenic T0 lines. Sanger

sequencing chromatogram of cloned *CAT3* in (E) WT and (F), (G), (H) *cat3*-KO T0 plants.

(I) Sequencing analysis of targeted region mutations of *CAT1* and *CAT3* in *cat1cat3*-KO

representative T0 lines. (J) Representative Sanger sequencing chromatograms of target site

from the *CAT1* locus in *cat1cat3*-KO lines. Representative Sanger sequencing chromatograms

of *CAT3* target site from the *CAT3* locus (K) in WT and (L), (M) in *cat1cat3*-KO lines. Detected insert

base was marked in asterisk and delete base was marked by a vertical line. (N) Phenotypes of WT

and transgenic plant in T0 lines. Scale bars = 6 cm (upper panel) and 2.5 cm (lower panel).

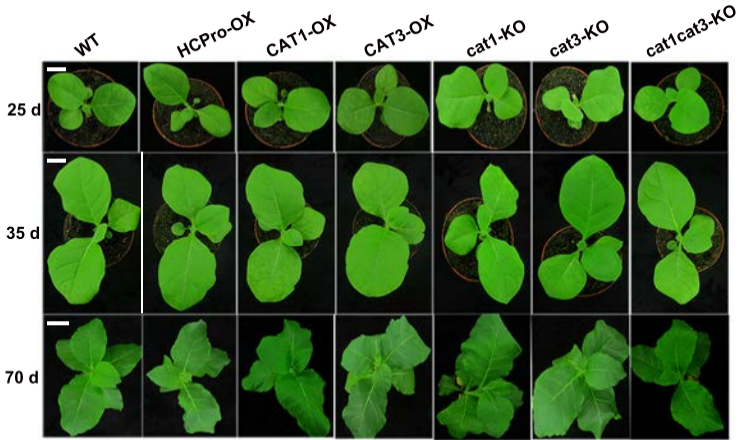

**Figure S6. Phenotype of WT and transgenic lines at different growing stage in T1 lines.**  
Scale bars = 2.5 cm (upper and middle panel) and 8 cm (lower panel).

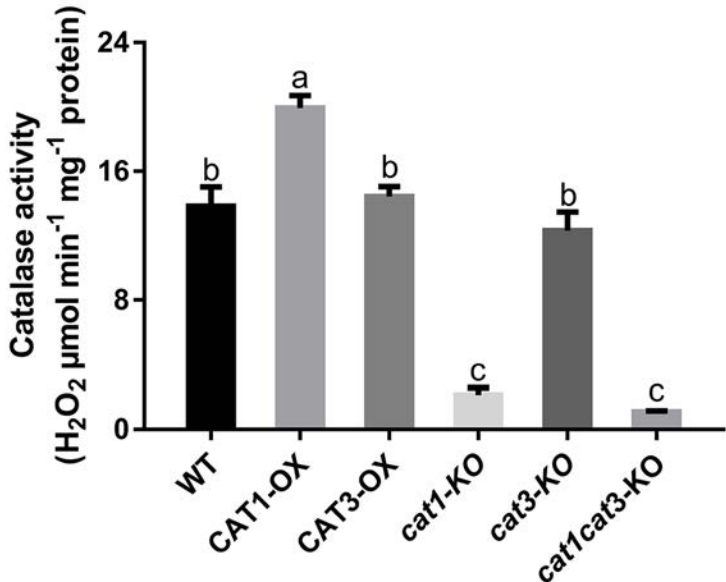

**Figure S7. Catalase activity of WT and transgenic lines.**

Bars represent mean and standard deviation of values obtained from three biological repeats. Significant differences ( $P < 0.05$ ) are denoted by different lowercase letters.

| Primer Names   | Primer Sequences (5'-3')                 | Purpose   |
|----------------|------------------------------------------|-----------|
| Yeast-CAT1-F   | CCG <b>GAATTC</b> ATGGCAAGTG AAAAGTGGTT  | Y2H       |
| Yeast-CAT1-R   | GCA <b>CTGCAGT</b> TACTGATGGGTGACTTCTC   | Y2H       |
| Yeast-CAT2-F   | CCG <b>GAATTC</b> ATGGATCCCTCTAAGTTTCGA  | Y2H       |
| Yeast-CAT2-R   | GCA <b>CTGCAGT</b> CACATTGTAGGCTTTAAAG   | Y2H       |
| Yeast-CAT3-F   | CCG <b>GAATTC</b> ATGGATCCATAACAAGTATCG  | Y2H       |
| Yeast-CAT3-R   | CGC <b>GTCGACT</b> CACATTGTGGGCCTTACAT   | Y2H       |
| Yeast-HCPro -F | CCG <b>GAATTC</b> ATGTCAGCAGGCGAGCTCTT   | Y2H       |
| Yeast-HCPro -R | CGC <b>GGATCC</b> CTAACCAACTCTGTACATT    | Y2H       |
| MBP-CAT1-F     | CCG <b>GAATTC</b> ATGGCAAGTG AAAAGTGGTT  | Pull down |
| MBP-CAT1-R     | GCA <b>CTGCAGT</b> TACTGATGGGTGACTTCTC   | Pull down |
| MBP-CAT2-F     | CCG <b>GAATTC</b> ATGGATCCCTCTAAGTTTCGA  | Pull down |
| MBP-CAT2-R     | GCA <b>CTGCAGT</b> CACATTGTAGGCTTTAAAG   | Pull down |
| MBP-CAT3-F     | CCG <b>GAATTC</b> ATGGATCCATAACAAGTATCG  | Pull down |
| MBP-CAT3-R     | CGC <b>GTCGACT</b> CACATTGTGGGCCTTACAT   | Pull down |
| GST-HCPro-F    | CCG <b>GAATTC</b> ATGTCAGCAGGCGAGCTCTT   | Pull down |
| GST-HCPro-R    | CGC <b>GTCGAC</b> CTAACCAACTCTGTACATT    | Pull down |
| GST-CAT1-F     | CCG <b>GAATTC</b> ATGGCAAGTG AAAAGTGGTT  | Pull down |
| GST-CAT1-R     | GCA <b>GTCGACT</b> TACTGATGGGTGACTTCTC   | Pull down |
| GST-CAT3-F     | CCG <b>GAATTC</b> ATGGATCCATAACAAGTATCG  | Pull down |
| GST-CAT3-R     | CGC <b>GTCGACT</b> CACATTGTGGGCCTTACAT   | Pull down |
| MBP-HCPro-F    | CCG <b>GAATTC</b> ATGTCAGCAGGCGAGCTCTT   | Pull down |
| MBP-HCPro-R    | CGC <b>GTCGAC</b> CTAACCAACTCTGTACATT    | Pull down |
| MBP-HC-N-F     | CCG <b>GAATTC</b> ATGTCAGCAGGCGAGCTCTT   | Pull down |
| MBP-HC-N-R     | CGC <b>GTCGAC</b> GCTTTTAAGTAATTGTACAGCA | Pull down |



|                   |                                           |           |
|-------------------|-------------------------------------------|-----------|
| MBP-HC-F          | CCG <b>GAATTC</b> ATGCACTTTTTAAGCTTTAAA   | Pull down |
| MBP-HC-R          | CGC <b>GTCGAC</b> CGATCCATCATCATAAGTTACA  | Pull down |
| MBP-HC-C-F        | CCG <b>GAATTC</b> ATGCCAGTTTTGTCAGAATTCAA | Pull down |
| MBP-HC-C-R        | CGC <b>GGATCC</b> CTAACCAACTCTGTACATT     | Pull down |
| BiFC-CAT1 -F      | TGCT <b>TAGAA</b> ATGGATCCATAACAAGTACCG   | BiFC      |
| BiFC-CAT1-R       | CGC <b>GTCGAC</b> TATGCTTGGTCTCACA        | BiFC      |
| BiFC-CAT2-F       | TGCT <b>TAGAA</b> ATGGATCCCTCTAAGTTTCG    | BiFC      |
| BiFC-CAT2-R       | CGC <b>GTCGAC</b> CATTGTAGGCTTTAAAG       | BiFC      |
| BiFC-CAT3-F       | TGCT <b>TAGAA</b> ATGGATCCATAACAAGTATCG   | BiFC      |
| BiFC-CAT3-R       | CGC <b>GTCGAC</b> CATTGTGGGCCTTACAT       | BiFC      |
| BiFC-HCPro-F      | CCG <b>GAATTC</b> ATGTCAGCAGGCGAGCTCTT    | BiFC      |
| BiFC-HCPro-R      | CGC <b>GTCGAC</b> CTAACCAACTCTGTACATT     | BiFC      |
| CAT1-F            | TCCACAAGATTACAGGCATA                      | qPCR      |
| CAT1-R            | AGCGGCAATAGAGTCATAG                       | qPCR      |
| CAT2-F            | CCAATTCCTTCTCGTGTCT                       | qPCR      |
| CAT2-R            | GTATCTGTCTTGCCTGTCA                       | qPCR      |
| CAT3-F            | AGGAGGAGCGAATCATAGT                       | qPCR      |
| CAT3-R            | TTCAATACCAAGCGACCAA                       | qPCR      |
| EF1 $\alpha$ -F   | TGCTGTAACAAGATGGATGC                      | qPCR      |
| EF1 $\alpha$ -R   | AGATGGGGACAAAGGGGATT                      | qPCR      |
| Coat protein-F    | AAACCCAGCCACAGTCTCGT                      | qPCR      |
| Coat protein-R    | ATCTCCGTCCATCATCACCC                      | qPCR      |
| NbEF1 $\alpha$ -F | AGCTTTACCTCCCAAGTCATC                     | qPCR      |
| NbEF1 $\alpha$ -R | AGAACGCCTGTCAATCTTGG                      | qPCR      |
| GFP-F             | ACATTATGGCAGACAAACAA                      | qPCR      |

|               |                                              |                     |
|---------------|----------------------------------------------|---------------------|
| GFP-R         | TTACAAACTCAAGAAGCACC                         | qPCR                |
| HCPPro - F    | ATGTCAGCAGGCGAGCTCTT                         | RT-PCR              |
| HCPPro - R    | CTAACCAACTCTGTACATT                          | RT-PCR              |
| RbohD-F       | ACACGATCACATGGCTTCGAAAT                      | Pull down           |
| RbohD-R       | GTGTATTCCAACCCCAAGAGCA                       | Pull down           |
| RbohF-F       | AGTAAGCCTGGATACATAGAC                        | Pull down           |
| RbohF-R       | CAAGAAGGTGGTGTGAATAC                         | Pull down           |
| 35S-CAT1-F    | CGC <b>GTCGAC</b> ATGGCAAGTG AAAAGTGGTT      | Overexpression, RSS |
| 35S-CAT1-R    | TGCT <b>CTAGAT</b> ATGCTTGGTCTCACA           | Overexpression, RSS |
| 35S-CAT3-F    | CGC <b>GTCGAC</b> ATGGATCCATAAAGTATCG        | Overexpression, RSS |
| 35S-CAT3-R    | CGG <b>GGTACC</b> CATTGTGGGCCTTACAT          | Overexpression, RSS |
| 35S-HCPPro-F  | CGC <b>GTCGAC</b> ATGTCAGCAGGCGAGCTCTT       | Overexpression, RSS |
| 35S-HCPPro-R  | CGG <b>GGTACC</b> CTAACCAACTCTGTACATT        | Overexpression, RSS |
| DT1- CAT1-BsF | ATATATGGTCTCGATTACAGGCATATGGACGGATCGTT       | Knock out           |
| DT1-CAT1-F0   | TGACAGGCATATGGACGGATCGTTGTTTTAGAGCTAGAAATAGC | Knock out           |
| DT2-CAT1-R0   | ATATATGGTCTCGATTGATCCGTCCATATGCCTGTAAGAGTT   | Knock out           |
| DT2-CAT1-BsR  | ATTATTGGTCTCGAAACGATCCGTCCATATGCCTGTAAGACAA  | Knock out           |
| DT1- CAT3-BsF | ATATATGGTCTCGATTGCAGATCTTGGGCACCGGACGTT      | Knock out           |
| DT1-CAT3-F0   | TGCAGATCTTGGGCACCGGACGTTTTAGAGCTAGAAATAGC    | Knock out           |
| DT2-CAT3-R0   | AACGTCCGGTGCCCAAGATCTGCAATCTCTTAGTCGACTCTAC  | Knock out           |
| DT2-CAT3-BsR  | ATTATTGGTCTCGAAACGTCCGGTGCCCAAGATCTGCAA      | Knock out           |
| DT2-CAT3-R0   | AACGAGGTGCCAGCGCCAAGGGCAATCTCTTAGTCGACTCTAC  | Knock out           |
| DT2-CAT3-BsR  | ATTATTGGTCTCGAAACGAGGTGCCAGCGCCAAGGGCAA      | Knock out           |
| U626-IDF      | TGTCCAGGATTAGAATGATTAGGC                     | Knock out           |
| U629-IDR      | AGCCCTCTTCTTTTCGATCCATCAAC                   | Knock out           |

|                |                                         |                      |
|----------------|-----------------------------------------|----------------------|
| Cas-CAT1-F     | ACGTGTCCCT GAACGTGTTG                   | Knock out            |
| Cas-CAT1-R     | ACTTCACATAGGTTGATTC                     | Knock out            |
| Cas-CAT3-F1    | CTTGGGCCAAACTATCTGCA                    | Knock out            |
| Cas-CAT3-R1    | GACGCAATCTTCTGACCAAG                    | Knock out            |
| Cas-CAT3-F2    | ATGGATCCATAACAAGTATCGT                  | Knock out            |
| Cas-CAT3-R2    | GACGCAATCTTCTGACCAAG                    | Knock out            |
| HPro-GFP-F     | CGC <b>GTCGAC</b> ATGTCAGCAGGCGAGCTCTT  | Subcellular location |
| HPro-GFP-R     | CGC <b>GGATCC</b> CTAACCAACTCTGTACATT   | Subcellular location |
| CAT1-mCherry-F | CCG <b>GTCGAG</b> ATGGATCCATAACAAGTACCG | Subcellular location |
| CAT1-mCherry-R | CGC <b>GTCGAC</b> TATGCTTGGTCTCACA      | Subcellular location |
| CAT3-mCherry-F | CCG <b>GTCGAG</b> ATGGATCCATAACAAGTATCG | Subcellular location |
| CAT3-mCherry-R | CGC <b>GTCGAC</b> CATTGTGGGCCTTACAT     | Subcellular location |

**Table S1. Primers used for construction of vectors and real-time PCR analysis.**
