# Supplementary material for: Chilli veinal mottle virus HCPro interacts with catalase to facilitate virus infection in Nicotiana tabacum
Source: PubMed Central journal article supplement (PMC7501817; doi:10.1093/jxb/eraa304), 2020-06-28
Supplement: eraa304_suppl_supplementary_table_s1.pdf [file eraa304_suppl_supplementary_table_s1.pdf]

| Primer Names   | Primer Sequences (5'-3')          | Purpose   |
|----------------|-----------------------------------|-----------|
| Yeast-CAT1-F   | CCGGAATTC ATGGCAAGTG AAAAGTGGTT   | Y2H       |
| Yeast-CAT1-R   | GCACTGCAGTTACTGATGGGTGACTTCTC     | Y2H       |
| Yeast-CAT2-F   | CCGGAATTCATGGATCCCTCTAAGTTTCGA    | Y2H       |
| Yeast-CAT2-R   | GCACTGCAGTCACATTGTAGGCTTTAAAG     | Y2H       |
| Yeast-CAT3-F   | CCGGAATTCATGGATCCATAACAAGTATCG    | Y2H       |
| Yeast-CAT3-R   | CGCGTTCGACTCACATTGTGGGCCTTACAT    | Y2H       |
| Yeast-HCPro -F | CCGGAATTC ATGTCAGCAGGCGAGCTCTT    | Y2H       |
| Yeast-HCPro -R | CGCGGATCCCTAACCAACTCTGTACATT      | Y2H       |
| MBP-CAT1-F     | CCGGAATTC ATGGCAAGTG AAAAGTGGTT   | Pull down |
| MBP-CAT1-R     | GCACTGCAGTTACTGATGGGTGACTTCTC     | Pull down |
| MBP-CAT2-F     | CCGGAATTCATGGATCCCTCTAAGTTTCGA    | Pull down |
| MBP-CAT2-R     | GCACTGCAGTCACATTGTAGGCTTTAAAG     | Pull down |
| MBP-CAT3-F     | CCGGAATTCATGGATCCATAACAAGTATCG    | Pull down |
| MBP-CAT3-R     | CGCGTTCGACTCACATTGTGGGCCTTACAT    | Pull down |
| GST-HCPro-F    | CCGGAATTCATGTCAGCAGGCGAGCTCTT     | Pull down |
| GST-HCPro-R    | CGCGTTCGACCTAACCAACTCTGTACATT     | Pull down |
| GST-CAT1-F     | CCGGAATTCATGGCAAGTG AAAAGTGGTT    | Pull down |
| GST-CAT1-R     | GCACTGCAGTTACTGATGGGTGACTTCTC     | Pull down |
| GST-CAT3-F     | CCGGAATTCATGGATCCATAACAAGTATCG    | Pull down |
| GST-CAT3-R     | CGCGTTCGACTCACATTGTGGGCCTTACAT    | Pull down |
| MBP-HCPro-F    | CCGGAATTCATGTCAGCAGGCGAGCTCTT     | Pull down |
| MBP-HCPro-R    | CGCGTTCGACCTAACCAACTCTGTACATT     | Pull down |
| MBP-HC-N-F     | CCGGAATTCATGTCAGCAGGCGAGCTCTT     | Pull down |
| MBP-HC-N-R     | CGCGTTCGACGCTTTTAAAGTAATTGTACAGCA | Pull down |

|                   |                                           |           |
|-------------------|-------------------------------------------|-----------|
| MBP-HC-F          | CCG <b>GAATTC</b> ATGCACTTTTTAAGCTTTAAA   | Pull down |
| MBP-HC-R          | CGCGTTCGACCGATCCATCATCATAAGTTACA          | Pull down |
| MBP-HC-C-F        | CCG <b>GAATTC</b> ATGCCAGTTTTGTCAGAATTCAA | Pull down |
| MBP-HC-C-R        | CGC <b>GGATCC</b> CTAACCAACTCTGTACATT     | Pull down |
| BiFC-CAT1 -F      | TGCT <b>CTAGA</b> ATGGATCCATAACAAGTACCG   | BiFC      |
| BiFC-CAT1-R       | CGC <b>GTCGAC</b> TATGCTTGGTCTCACA        | BiFC      |
| BiFC-CAT2-F       | TGCT <b>CTAGA</b> ATGGATCCCTCTAAGTTTCG    | BiFC      |
| BiFC-CAT2-R       | CGC <b>GTCGAC</b> CATTGTAGGCTTTAAAG       | BiFC      |
| BiFC-CAT3-F       | TGCT <b>CTAGA</b> ATGGATCCATAACAAGTATCG   | BiFC      |
| BiFC-CAT3-R       | CGC <b>GTCGAC</b> CATTGTGGGCCTTACAT       | BiFC      |
| BiFC-HCPro-F      | CCG <b>GAATTC</b> ATGTCAGCAGGCGAGCTCTT    | BiFC      |
| BiFC-HCPro-R      | CGC <b>GTCGAC</b> CTAACCAACTCTGTACATT     | BiFC      |
| CAT1-F            | TCCACAAGATTACAGGCATA                      | qPCR      |
| CAT1-R            | AGCGGCAATAGAGTCATAG                       | qPCR      |
| CAT2-F            | CCAATTCCTTCTCGTGTCT                       | qPCR      |
| CAT2-R            | GTATCTGTCTTGCCTGTCA                       | qPCR      |
| CAT3-F            | AGGAGGAGCGAATCATAGT                       | qPCR      |
| CAT3-R            | TTCAATACCAAGCGACCAA                       | qPCR      |
| EF1 $\alpha$ -F   | TGCTGTAACAAGATGGATGC                      | qPCR      |
| EF1 $\alpha$ -R   | AGATGGGGACAAAGGGGATT                      | qPCR      |
| Coat protein-F    | AAACCCAGCCACAGTCTCGT                      | qPCR      |
| Coat protein-R    | ATCTCCGTCCATCATCACCC                      | qPCR      |
| NbEF1 $\alpha$ -F | AGCTTTACCTCCCAAGTCATC                     | qPCR      |
| NbEF1 $\alpha$ -R | AGAACGCCTGTCAATCTTGG                      | qPCR      |
| GFP-F             | ACATTATGGCAGACAAACAA                      | qPCR      |

|               |                                              |                     |
|---------------|----------------------------------------------|---------------------|
| GFP-R         | TTACAAACTCAAGAAGCACC                         | qPCR                |
| HCPPro-F      | ATGTCAGCAGGCGAGCTCTT                         | RT-PCR              |
| HCPPro-R      | CTAACCAACTCTGTACATT                          | RT-PCR              |
| RbohD-F       | ACACGATCACATGGCTTCGAAAT                      | qPCR                |
| RbohD-R       | GTGTATTCCAACCCCAAGAGCA                       | qPCR                |
| RbohF-F       | AGTAAGCCTGGATACATAGAC                        | qPCR                |
| RbohF-R       | CAAGAAGGTGGTGTGAATAC                         | qPCR                |
| 35S-CAT1-F    | CGC <b>GTCGAC</b> ATGGCAAGTG AAAAGTGGTT      | Overexpression, RSS |
| 35S-CAT1-R    | TGCT <b>CTAGAT</b> ATGCTTGGTCTCACA           | Overexpression, RSS |
| 35S-CAT3-F    | CGC <b>GTCGAC</b> ATGGATCCATAAAGTATCG        | Overexpression, RSS |
| 35S-CAT3-R    | CGG <b>GGTACC</b> CATTGTGGGCCTTACAT          | Overexpression, RSS |
| 35S-HCPPro-F  | CGC <b>GTCGAC</b> ATGTCAGCAGGCGAGCTCTT       | Overexpression, RSS |
| 35S-HCPPro-R  | CGG <b>GGTACC</b> CTAACCAACTCTGTACATT        | Overexpression, RSS |
| DT1- CAT1-BsF | ATATATGGTCTCGATTACAGGCATATGGACGGATCGTT       | Knock out           |
| DT1-CAT1-F0   | TGACAGGCATATGGACGGATCGTTGTTTTAGAGCTAGAAATAGC | Knock out           |
| DT2-CAT1-R0   | ATATATGGTCTCGATTGATCCGTCCATATGCCTGTAAGAGTT   | Knock out           |
| DT2-CAT1-BsR  | ATTATTGGTCTCGAAACGATCCGTCCATATGCCTGTAAGACAA  | Knock out           |
| DT1- CAT3-BsF | ATATATGGTCTCGATTGCAGATCTTGGGCACCGGACGTT      | Knock out           |
| DT1-CAT3-F0   | TGCAGATCTTGGGCACCGGACGTTTTAGAGCTAGAAATAGC    | Knock out           |
| DT2-CAT3-R0   | AACGTCCGGTGCCCAAGATCTGCAATCTCTTAGTCGACTCTAC  | Knock out           |
| DT2-CAT3-BsR  | ATTATTGGTCTCGAAACGTCCGGTGCCCAAGATCTGCAA      | Knock out           |
| DT2-CAT3-R0   | AACGAGGTGCCAGCGCCAAGGGCAATCTCTTAGTCGACTCTAC  | Knock out           |
| DT2-CAT3-BsR  | ATTATTGGTCTCGAAACGAGGTGCCAGCGCCAAGGGCAA      | Knock out           |
| U626-IDF      | TGTCCAGGATTAGAATGATTAGGC                     | Knock out           |
| U629-IDR      | AGCCCTCTTCTTTCGATCCATCAAC                    | Knock out           |

|                |                                        |                      |
|----------------|----------------------------------------|----------------------|
| Cas-CAT1-F     | ACGTGTCCCT GAACGTGTTG                  | Knock out            |
| Cas-CAT1-R     | ACTTCACATAGGTTGATTC                    | Knock out            |
| Cas-CAT3-F1    | CTTGGGCCAAACTATCTGCA                   | Knock out            |
| Cas-CAT3-R1    | GACGCAATCTTCTGACCAAG                   | Knock out            |
| Cas-CAT3-F2    | ATGGATCCATACAAGTATCGT                  | Knock out            |
| Cas-CAT3-R2    | GACGCAATCTTCTGACCAAG                   | Knock out            |
| HPro-GFP-F     | CGC <b>GTCGAC</b> ATGTCAGCAGGCGAGCTCTT | Subcellular location |
| HPro-GFP-R     | CGC <b>GGATCC</b> CTAACCAACTCTGTACATT  | Subcellular location |
| CAT1-mCherry-F | CCG <b>CTCGAG</b> ATGGATCCATACAAGTACCG | Subcellular location |
| CAT1-mCherry-R | CGC <b>GTCGAC</b> TATGCTTGGTCTCACA     | Subcellular location |
| CAT3-mCherry-F | CCG <b>CTCGAG</b> ATGGATCCATACAAGTATCG | Subcellular location |
| CAT3-mCherry-R | CGC <b>GTCGAC</b> CATTGTGGGCCTTACAT    | Subcellular location |
